# Supplementary material for: The effect of Cu loading on Ni/carbon nanotubes catalysts for hydrodeoxygenation of guaiacol
Source: Royal Society of Chemistry journal article supplement (doi:10.1039/c6ra00041j), 2016-01-01

**Figure S1.** XPS spectra of the Cu 2p region for the reduced catalysts a) NiCu<sub>1.5</sub>/CNT, b) NiCu<sub>2.25</sub>/CNT c) NiCu<sub>3.0</sub>/CNT d) NiCu<sub>3.75</sub>/CNT e) Cu/CNT

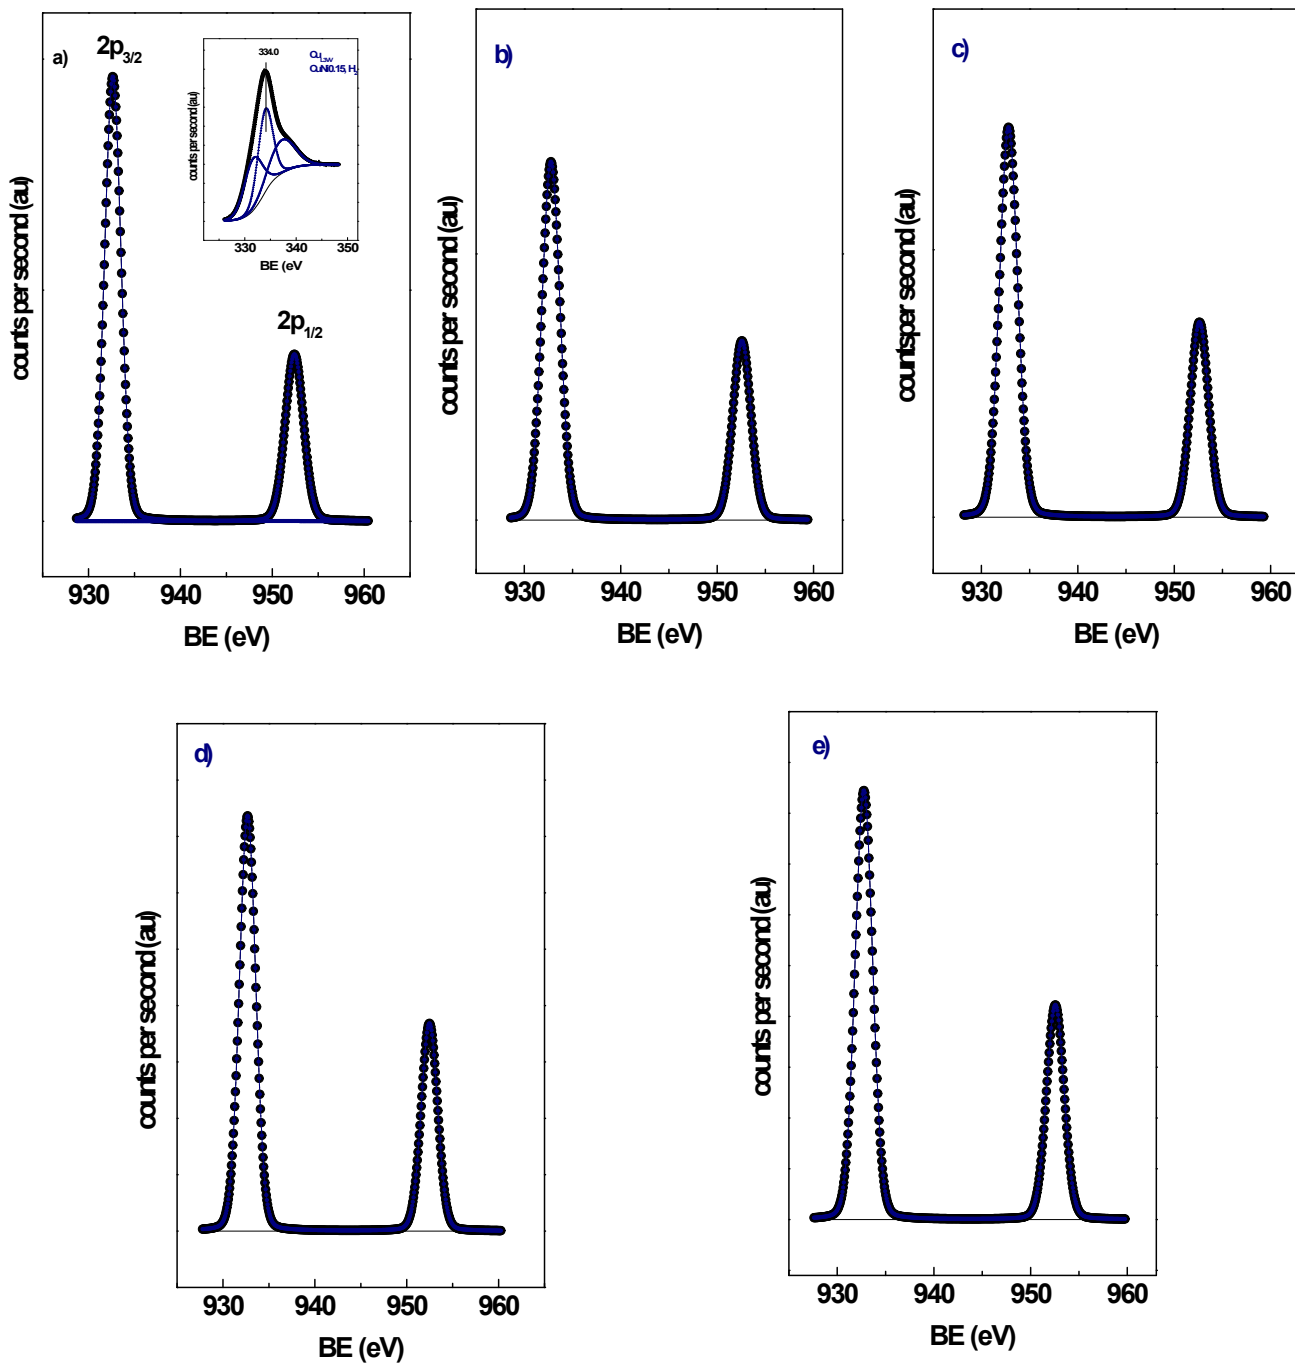

Supplement: c6ra00041j1.pdf [file c6ra00041j1.pdf]
